# Supplementary material
Source: Springer Nature journal article supplement (https://www.springermedizin.de/resource/supplementary/12968_2013_3355_MOESM1_ESM.pdf/9583484)
Supplement: MOESM1 [file 9583484]

Men <70 years of age  
n = 157

Clinical and  
biochemical screening

n = 101

CMR and <sup>1</sup>H-MRS

MetS present  
n = 37

MetS absent  
n = 38

56 subjects excluded:

- 4 with type 2 DM
- 3 with chronic disease
- 30 with waist circumference  $\geq 94$  cm but without additional criteria of the MetS
- 19 with waist circumference <94 cm but abnormal lipid profile

26 subjects excluded:

- 24 with unavailable CMR data
- 2 with technically suboptimal CMR data
